# Supplementary material for: Exploring the Molecular Interactions of 7,8-Dihydroxyflavone and Its Derivatives with TrkB and VEGFR2 Proteins
Source: MDPI journal article supplement (doi:10.3390/ijms160921087), 2015-09-03
Supplement: s1 [file s1]

## Supplementary Information

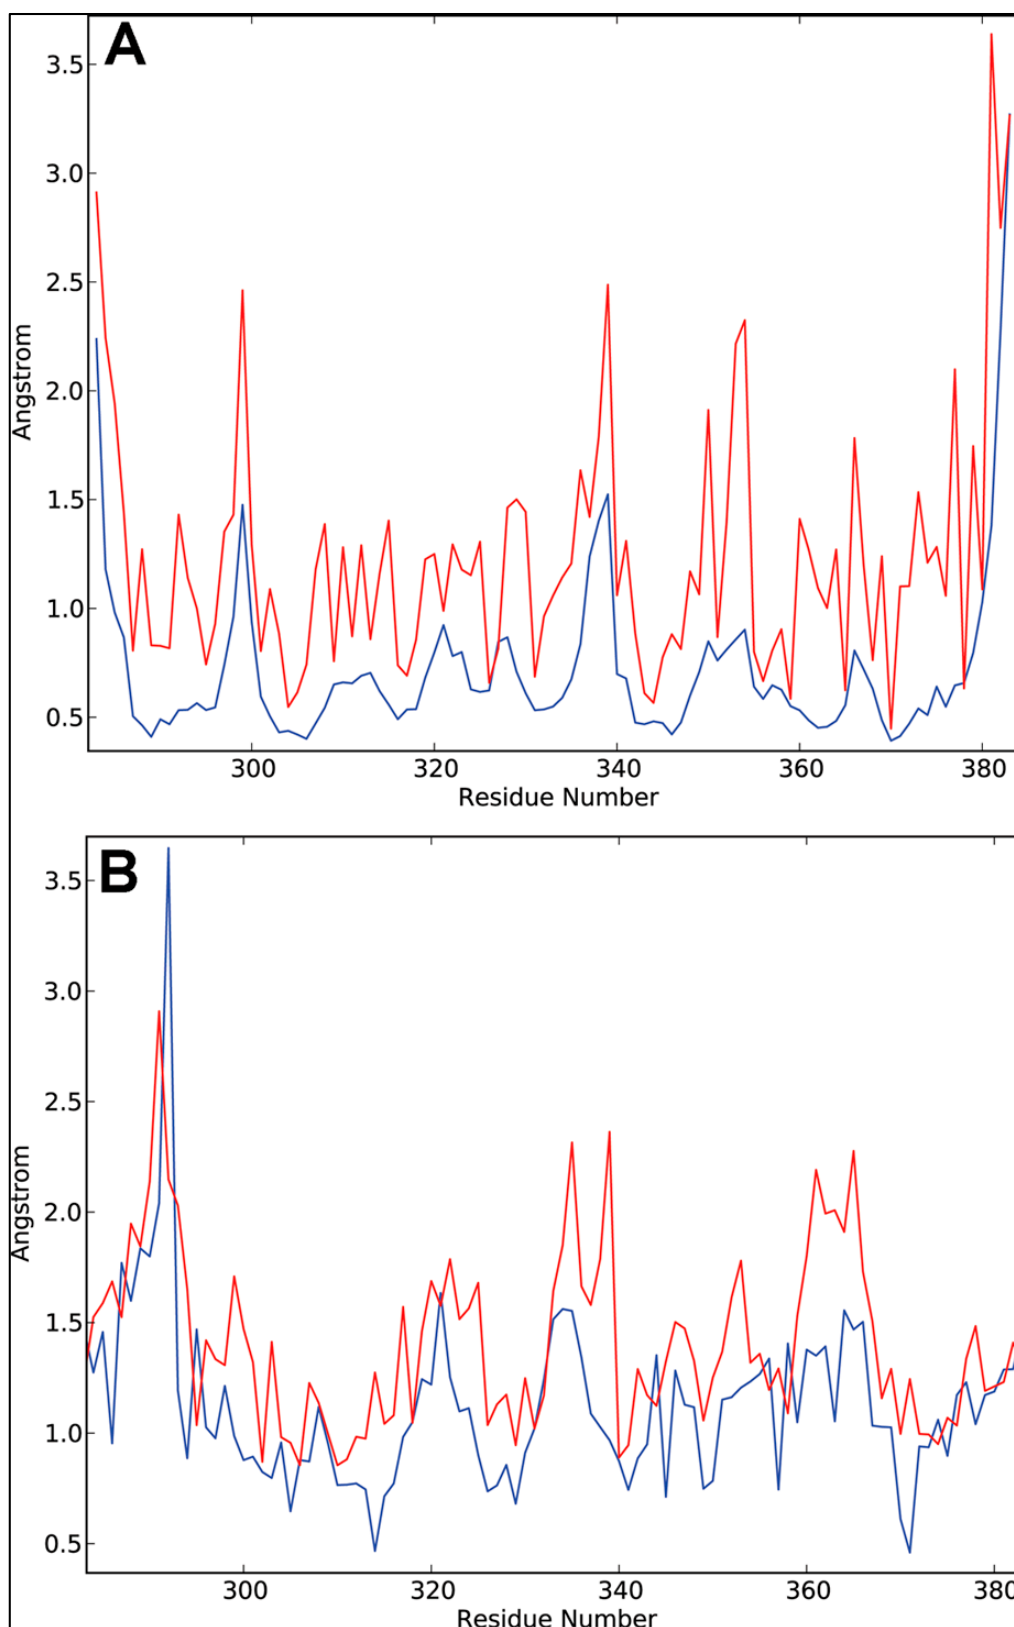

**Figure S1.** RMSF of backbone and side chain during 10 ns MD simulations. Blue color indicates backbone and red color indicates side chains. (A) 7,8-DHF-TrkB complex; and (B) 7,8-DHF-VEGFR2 complex.

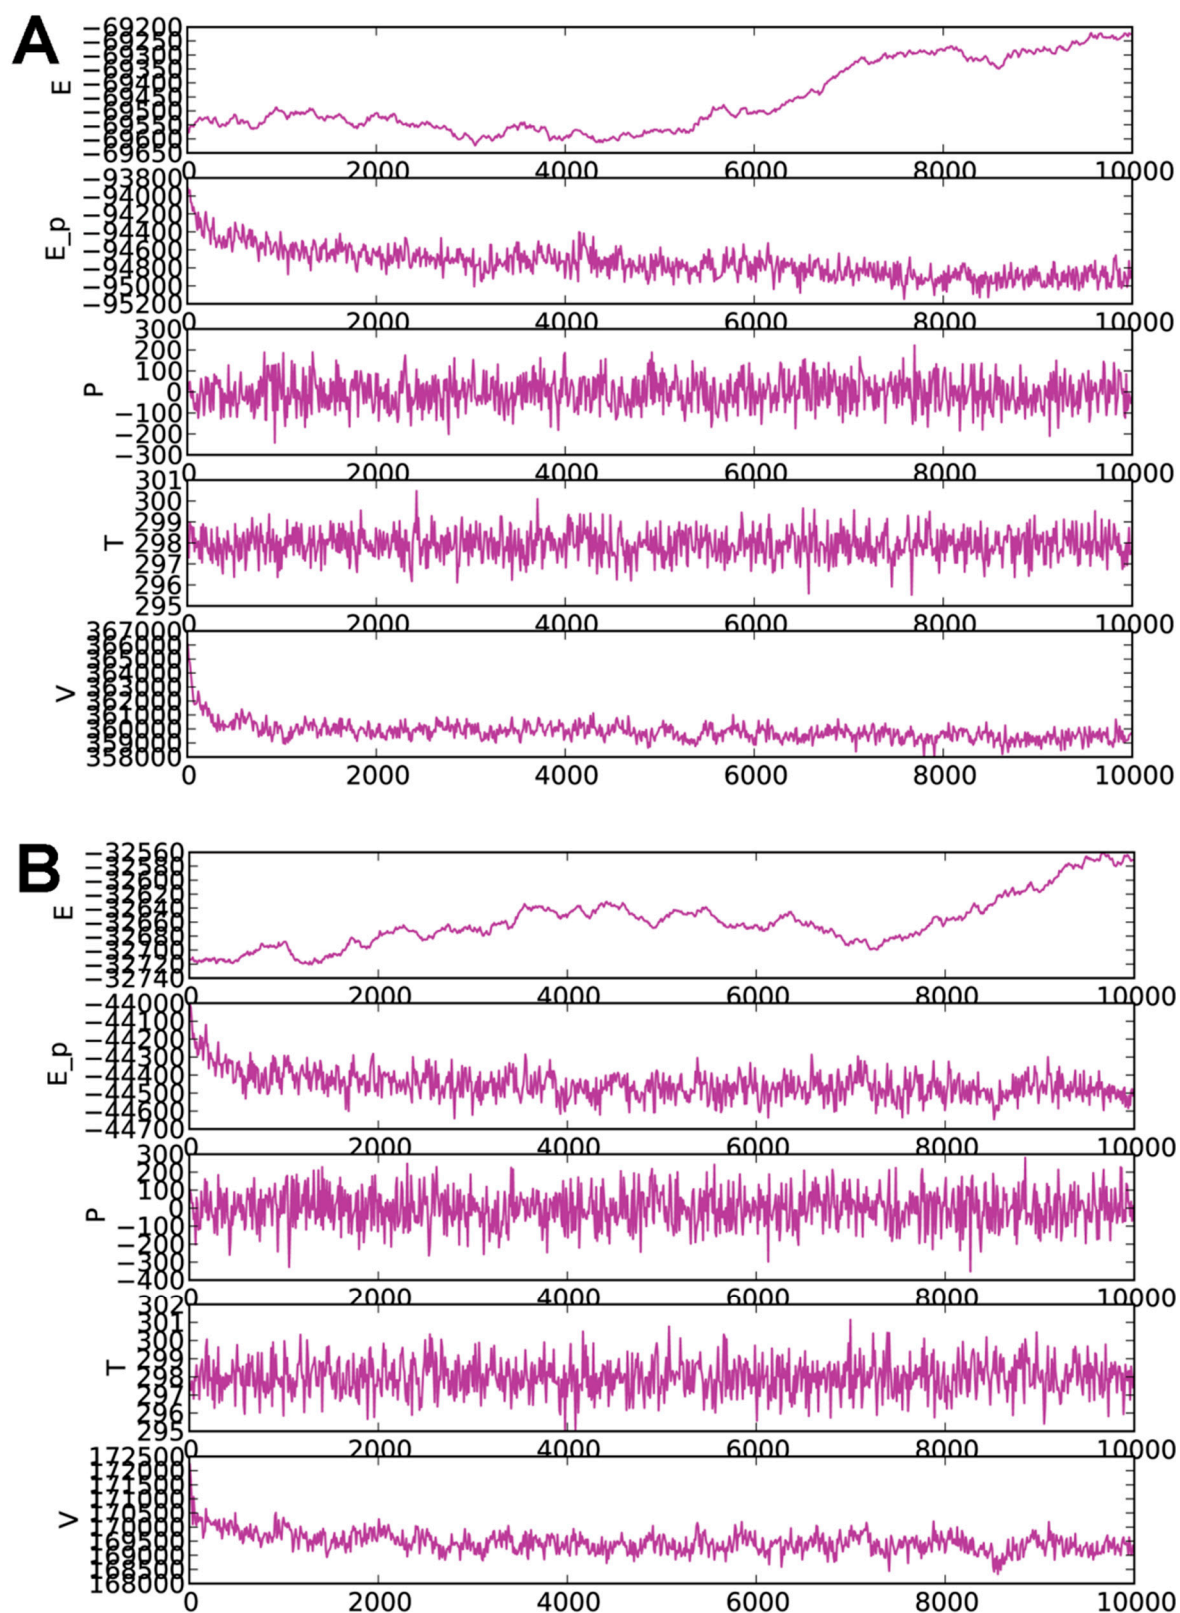

**Figure S2.** Energy peak during 10 ns MD simulation. (A) 7,8-DHF-TrkB complex; and (B) 7,8-DHF-VEGFR2 complex.

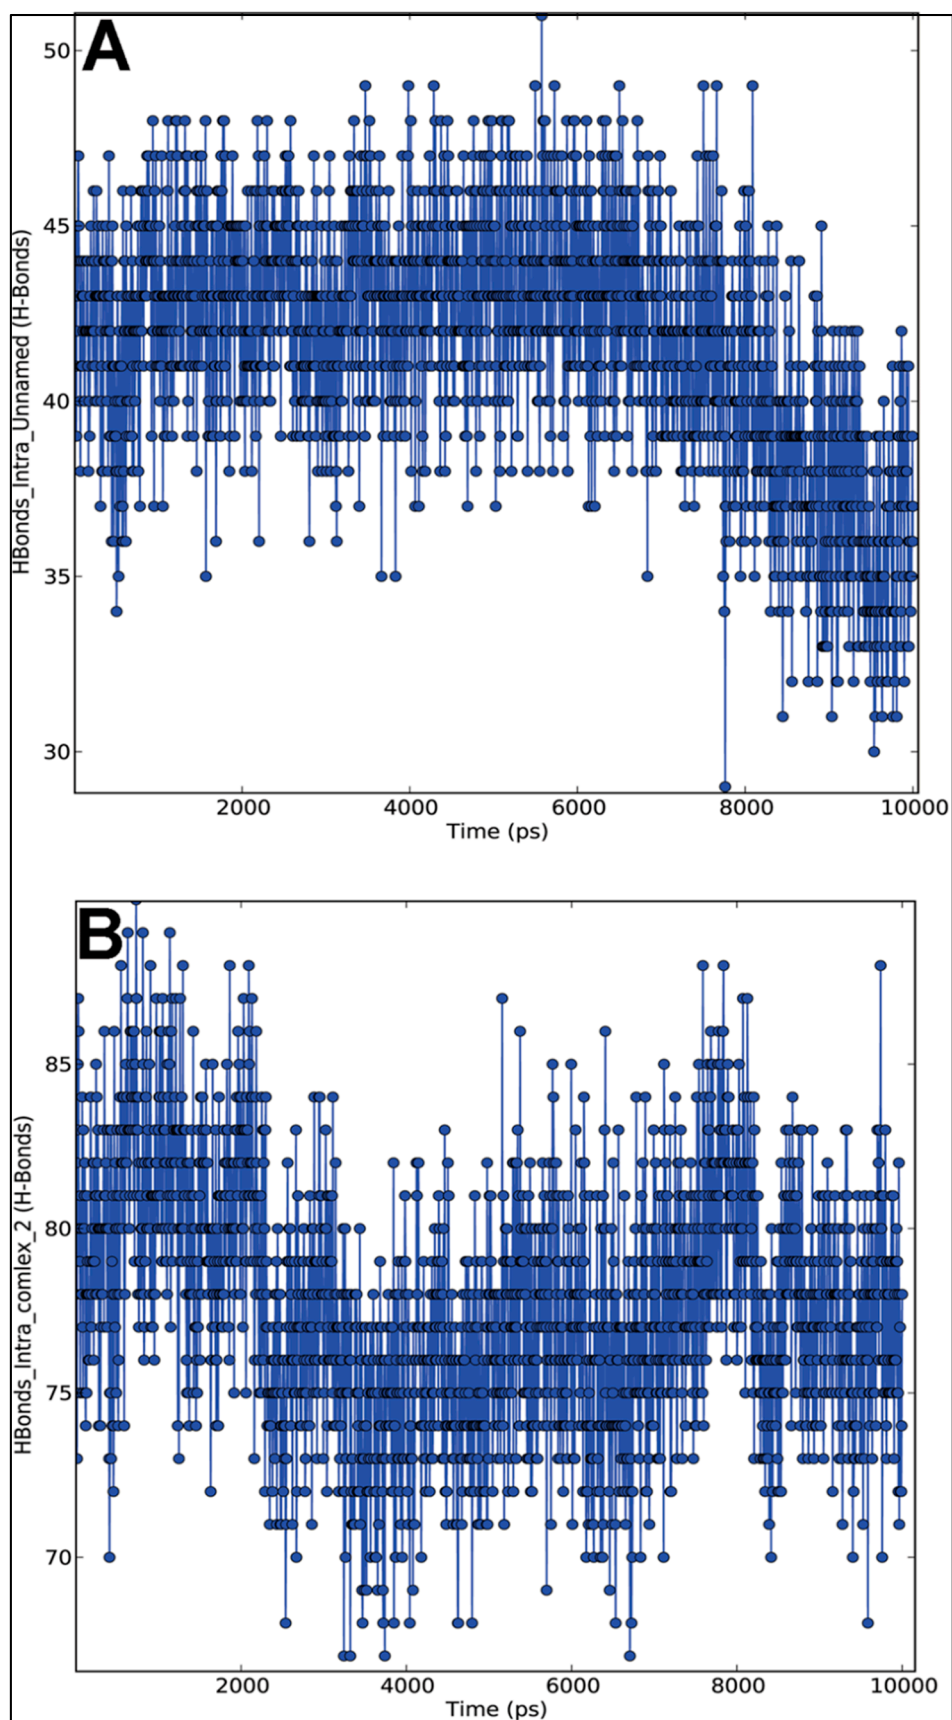

**Figure S3.** H-bonds formed during total course of 10,000 ps MD simulations. (A) 7,8-DHF-TrkB complex; and (B) 7,8-DHF-VEGFR2 docking complex.

**A**

|                 |                                    |                             |      |
|-----------------|------------------------------------|-----------------------------|------|
| sp VEGFR2_HUMAN | MSELKILIHIGHHLNVVNLLGACTKPGGPLMVI  | <b>VEFC</b> KFGNLSTYLRSKR   | 932  |
| sp TrkB_HUMAN   | QREAE LLTMLQHQH-IVRFFGVCTE-GRPLLMV | <b>FEYMR</b> HGDLNRFLRSHG   | 605  |
| sp IGF1R_HUMAN  | LNEASVMKEFNCHH-VVRL LGVVSQ-GQPTLVI | <b>MELMT</b> RGDLKSYLRSLR   | 1095 |
| sp STK4_HUMAN   | MDSGTMVRAVGDEMGTVRVASTMTD-GANTMIE  | <b>HDDT</b> LP SQLGTMVINA E | 373  |
| sp PK3CG_HUMAN  | WLEFKCADPTALSNETIGIIFKHGDDL RQDMLI | <b>LQITL</b> RIMESI WETESLD | 861  |
| sp CDCP1_HUMAN  | WNISVPRDQVACL TFFKERSGVVCQTGRAFMII | <b>QEQR</b> TRAEEIFSLDEDV   | 625  |

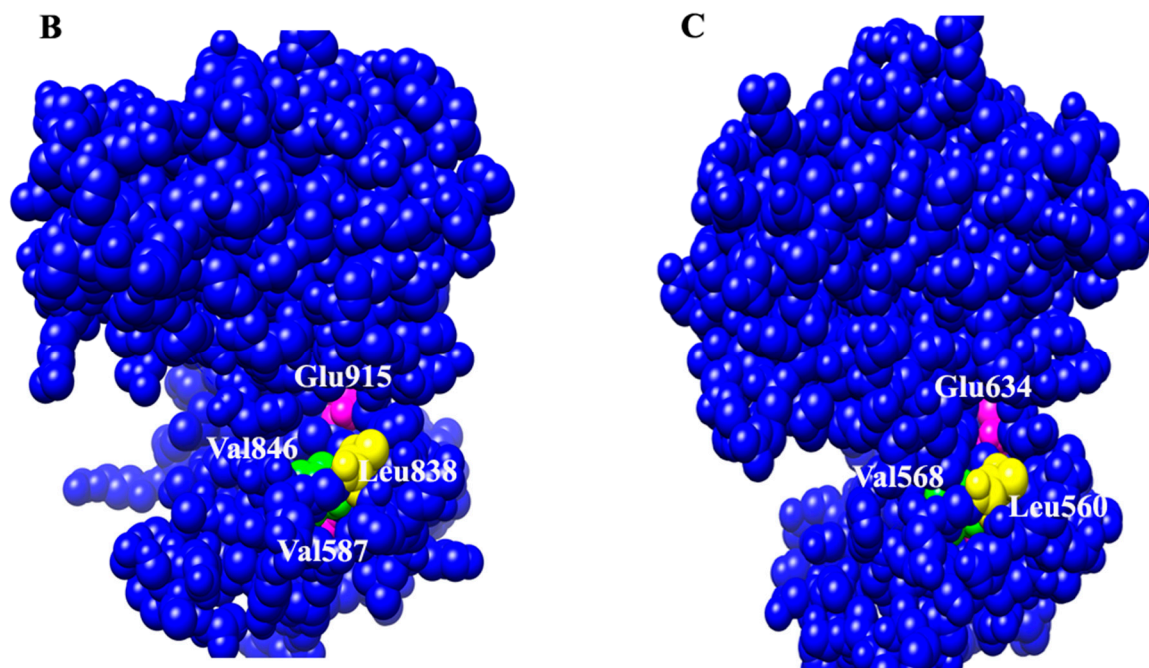

**Figure S4.** (A) Multiple sequence alignment of 7,8-DHF interacting residue at ATP binding site of VEGFR2 (red) with corresponding residues from various other kinases (blue and green); Space filled models (blue) highlighting the 7,8-DHF interacting residues of (B) VEGFR2 (Left) and its topological comparison with (C) TrkB (Right).

**Table S1.** Toxicity prediction of 37 di-hydroxy flavanoid derivatives including 7,8-DHF using ToxPredict program. S.No: Serial number; C.No.: Compound number;  $M_w$ : Molecular weight.

| S.No | C.No    | Pubchem CID  | $M_w$  | Carcinogenic<br>Potency DBS<br>Mouse | Carcinogenic<br>Potency DBS<br>MultiCellCall | Carcinogenic<br>Potency DBS<br>Mutagenicity | Carcinogenic<br>Potency DBS Rat | Carcinogenic<br>Potency DBS<br>SingleCellCall | Eye Irritation |
|------|---------|--------------|--------|--------------------------------------|----------------------------------------------|---------------------------------------------|---------------------------------|-----------------------------------------------|----------------|
| 1    | 7,8-DHF | CID_44335549 | 256.25 | non-carcinogen                       | non-carcinogen                               | non-mutagenic                               | non-carcinogen                  | non-carcinogen                                | No             |
| 2    | C1      | CID_17874507 | 256.25 | non-carcinogen                       | non-carcinogen                               | non-mutagenic                               | non-carcinogen                  | non-carcinogen                                | No             |
| 3    | C2      | CID_676289   | 254.24 | non-carcinogen                       | carcinogen                                   | mutagenic                                   | carcinogen                      | carcinogen                                    | No             |
| 4    | C3      | CID_44257593 | 254.24 | non-carcinogen                       | carcinogen                                   | mutagenic                                   | carcinogen                      | carcinogen                                    | No             |
| 5    | C4      | CID_688660   | 254.24 | non-carcinogen                       | carcinogen                                   | mutagenic                                   | non carcinogen                  | carcinogen                                    | No             |
| 6    | C5      | CID_44257596 | 296.27 | non-carcinogen                       | carcinogen                                   | mutagenic                                   | non carcinogen                  | carcinogen                                    | No             |
| 7    | C6      | CID_165521   | 254.24 | non-carcinogen                       | carcinogen                                   | mutagenic                                   | non carcinogen                  | carcinogen                                    | No             |
| 8    | C7      | CID_455313   | 254.24 | non-carcinogen                       | carcinogen                                   | mutagenic                                   | carcinogen                      | carcinogen                                    | No             |
| 9    | C8      | CID_688715   | 254.24 | non-carcinogen                       | carcinogen                                   | mutagenic                                   | carcinogen                      | carcinogen                                    | No             |
| 10   | C9      | CID_145726   | 254.24 | non-carcinogen                       | carcinogen                                   | mutagenic                                   | carcinogen                      | carcinogen                                    | No             |
| 11   | C10     | CID_44257601 | 416.38 | non-carcinogen                       | carcinogen                                   | mutagenic                                   | non-carcinogen                  | carcinogen                                    | Yes            |
| 12   | C11     | CID_5315263  | 374.34 | non-carcinogen                       | carcinogen                                   | mutagenic                                   | carcinogen                      | carcinogen                                    | No             |
| 13   | C12     | CID_5393151  | 254.24 | non-carcinogen                       | carcinogen                                   | mutagenic                                   | non-carcinogen                  | carcinogen                                    | No             |
| 14   | C13     | CID_45933941 | 254.24 | non-carcinogen                       | carcinogen                                   | mutagenic                                   | carcinogen                      | carcinogen                                    | No             |
| 15   | C14     | CID_688659   | 254.24 | non-carcinogen                       | carcinogen                                   | mutagenic                                   | non-carcinogen                  | carcinogen                                    | No             |
| 16   | C15     | CID_5393152  | 254.24 | non-carcinogen                       | carcinogen                                   | mutagenic                                   | non-carcinogen                  | carcinogen                                    | No             |
| 17   | C16     | CID_182362   | 254.24 | non-carcinogen                       | carcinogen                                   | mutagenic                                   | non-carcinogen                  | carcinogen                                    | No             |
| 18   | C17     | CID_5282073  | 254.24 | non-carcinogen                       | carcinogen                                   | mutagenic                                   | carcinogen                      | carcinogen                                    | No             |
| 19   | C18     | CID_676030   | 254.24 | non-carcinogen                       | carcinogen                                   | mutagenic                                   | non-carcinogen                  | carcinogen                                    | No             |
| 20   | C19     | CID_5464381  | 314.29 | non-carcinogen                       | carcinogen                                   | mutagenic                                   | non-carcinogen                  | carcinogen                                    | No             |
| 21   | C20     | CID_14349487 | 254.24 | non-carcinogen                       | carcinogen                                   | mutagenic                                   | non-carcinogen                  | carcinogen                                    | No             |
| 22   | C21     | CID_5280442  | 284.26 | non-carcinogen                       | carcinogen                                   | mutagenic                                   | non-carcinogen                  | carcinogen                                    | No             |
| 23   | C22     | CID_5281607  | 254.24 | non-carcinogen                       | carcinogen                                   | mutagenic                                   | non-carcinogen                  | carcinogen                                    | No             |
| 24   | C23     | CID_5575368  | 358.34 | non-carcinogen                       | non-carcinogen                               | non-mutagenic                               | non-carcinogen                  | non-carcinogen                                | No             |
| 25   | C24     | CID_5490092  | 416.38 | non-carcinogen                       | carcinogen                                   | mutagenic                                   | carcinogen                      | carcinogen                                    | Yes            |

Table S1. *Cont.*

| S.No | C.No | Pubchem CID  | $M_w$  | Carcinogenic<br>Potency DBS<br>Mouse | Carcinogenic<br>Potency DBS<br>MultiCellCall | Carcinogenic<br>Potency DBS<br>Mutagenicity | Carcinogenic<br>Potency DBS Rat | Carcinogenic<br>Potency DBS<br>SingleCellCall | Eye Irritation |
|------|------|--------------|--------|--------------------------------------|----------------------------------------------|---------------------------------------------|---------------------------------|-----------------------------------------------|----------------|
| 26   | C25  | CID_11055    | 254.24 | non-carcinogen                       | carcinogen                                   | mutagenic                                   | non-carcinogen                  | carcinogen                                    | No             |
| 27   | C26  | CID_5353357  | 254.24 | non-carcinogen                       | carcinogen                                   | mutagenic                                   | non-carcinogen                  | carcinogen                                    | No             |
| 28   | C27  | CID_57368355 | 322.16 | non-carcinogen                       | carcinogen                                   | mutagenic                                   | carcinogen                      | carcinogen                                    | Yes            |
| 29   | C28  | CID_5318083  | 462.4  | non-carcinogen                       | carcinogen                                   | mutagenic                                   | non-carcinogen                  | carcinogen                                    | Yes            |
| 30   | C29  | CID_5391149  | 254.24 | non-carcinogen                       | carcinogen                                   | mutagenic                                   | carcinogen                      | carcinogen                                    | No             |
| 31   | C30  | CID_44257565 | 416.38 | non-carcinogen                       | carcinogen                                   | mutagenic                                   | non-carcinogen                  | carcinogen                                    | Yes            |
| 32   | C31  | CID_5391140  | 254.24 | non-carcinogen                       | carcinogen                                   | mutagenic                                   | carcinogen                      | carcinogen                                    | No             |
| 33   | C32  | CID_44257571 | 416.38 | non-carcinogen                       | carcinogen                                   | mutagenic                                   | non-carcinogen                  | carcinogen                                    | Yes            |
| 34   | C33  | CID_44257573 | 562.52 | non-carcinogen                       | carcinogen                                   | mutagenic                                   | non-carcinogen                  | carcinogen                                    | Yes            |
| 35   | C34  | CID_64982    | 446.36 | non-carcinogen                       | non-carcinogen                               | mutagenic                                   | non-carcinogen                  | carcinogen                                    | Yes            |
| 36   | C35  | CID_14034267 | 254.24 | non-carcinogen                       | carcinogen                                   | mutagenic                                   | non-carcinogen                  | carcinogen                                    | No             |
| 37   | C36  | CID_44257569 | 416.38 | non-carcinogen                       | non-carcinogen                               | non-mutagenic                               | non-carcinogen                  | non-carcinogen                                | Yes            |
